# Supplementary material
Source: publisher site journal article supplement (https://www.dovepress.com/article/411183)

**Supplementary Table 1** Levels of clinical characteristics during treatment

| Characteristics | Time point | TDF plus PegIFN-α | TAF plus PegIFN-α | P-value |
| --- | --- | --- | --- | --- |
|  |  | Mean (SD) | Mean (SD) |  |
| ALT (U/L) | 0 week | 68.22 (85.74) | 53.48 (51.99) | 0.360 |
| 12 week | 78.78 (47.52) | 77.55 (96.20) | 0.930 |
| 24 week | 78.41 (77.83) | 74.00 (130.30) | 0.828 |
| 36 week | 66.58 (58.07) | 77.33 (94.18) | 0.516 |
| 48 week | 60.84 (46.89) | 53.73 (54.85) | 0.613 |
| AST (U/L) | 0 week | 39.07 (33.19) | 30.64 (15.00) | 0.164 |
| 12 week | 51.31 (28.93) | 55.52 (61.91) | 0.633 |
| 24 week | 49.00 (30.36) | 48.71 (59.71) | 0.973 |
| 36 week | 44.70 (34.84) | 51.42 (45.00) | 0.456 |
| 48 week | 42.16 (29.78) | 41.93 (33.99) | 0.979 |
| ALP (U/L) | 0 week | 87.36 (21.51) | 86.97 (30.10) | 0.938 |
| 12 week | 95.78 (21.38) | 94.00 (27.27) | 0.724 |
| 24 week | 88.01 (22.73) | 87.10 (30.07) | 0.863 |
| 36 week | 87.34 (19.70) | 82.58 (24.74) | 0.307 |
| 48 week | 84.21 (20.54) | 83.2 (20.54) | 0.870 |
| γ-GGT (U/L) | 0 week | 35.88 (55.94) | 29.94 (17.89) | 0.552 |
| 12 week | 51.53 (35.46) | 59.83 (46.92) | 0.328 |
| 24 week | 56.72 (45.46) | 54.10 (45.23) | 0.786 |
| 36 week | 56.03 (48.07) | 69.88 (62.13) | 0.268 |
| 48 week | 57.16 (51.44) | 61.53 (59.40) | 0.776 |
| WBC (10^9/L) | 0 week | 5.08 (1.55) | 5.72 (1.91) | 0.064 |
| 12 week | 3.18 (0.94) | 3.37 (1.02) | 0.356 |
| 24 week | 3.07 (0.79) | 3.27 (0.89) | 0.257 |
| 36 week | 3.06 (0.75) | 3.17 (1.07) | 0.561 |
| 48 week | 2.99 (0.63) | 3.60 (0.90) | 0.003 |
| RBC (10^9/L) | 0 week | 5.06 (0.53) | 4.91 (0.53) | 0.178 |
| 12 week | 4.79 (0.58) | 4.64 (0.58) | 0.232 |
| 24 week | 4.65 (0.58) | 4.46 (0.56) | 0.115 |
| 36 week | 4.65 (0.58) | 4.34 (0.59) | 0.026 |
| 48 week | 4.62 (0.49) | 4.38 (0.61) | 0.110 |
| PLT (10^9/L) | 0 week | 201.09 (54.55) | 221.19 (53.83) | 0.080 |
| 12 week | 123.84 (41.06) | 138.60 (37.32) | 0.090 |
| 24 week | 123.89 (38.39) | 131.23 (37.08) | 0.373 |
| 36 week | 124.27 (38.93) | 127.21 (34.89) | 0.745 |
| 48 week | 127.76 (37.27) | 132.40 (34.93) | 0.665 |
| NEU (%) | 0 week | 57.11 (11.08) | 60.19 (7.71) | 0.154 |
| 12 week | 52.21 (9.72) | 50.59 (8.94) | 0.432 |
| 24 week | 52.40 (9.78) | 51.80 (9.17) | 0.774 |
| 36 week | 51.92 (9.92) | 51.53 (9.33) | 0.865 |
| 48 week | 50.89 (9.81) | 53.94 (9.05) | 0.279 |

**Supplementary Figure 1** Patients screening process


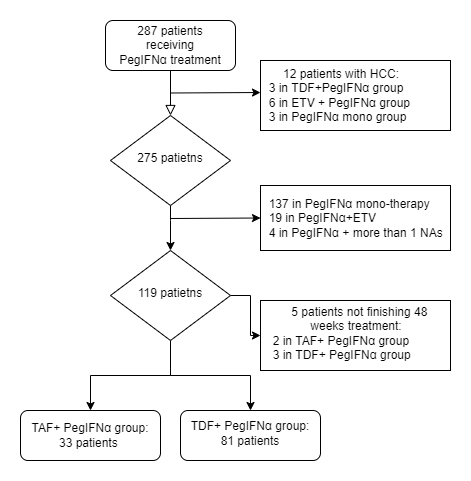


**Supplementary Figure 2** Forest plot of subgroup analysis of HBsAg loss rate at 48 weeks between HBsAg-positive and HBeAg-negative patients


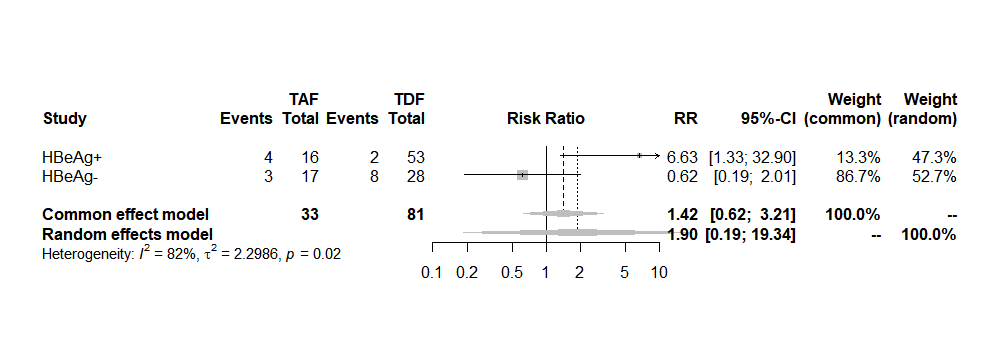


**Supplementary Figure 3** Clinical characteristics changes during treatment

(A) Levels of white blood cell at different treatment times in the two groups. (B) Levels of red blood cell at different treatment times in the two groups. (C) Levels of platelet at different treatment times in the two groups. (D) Levels of neutrophil percentage at different treatment times in the two groups.


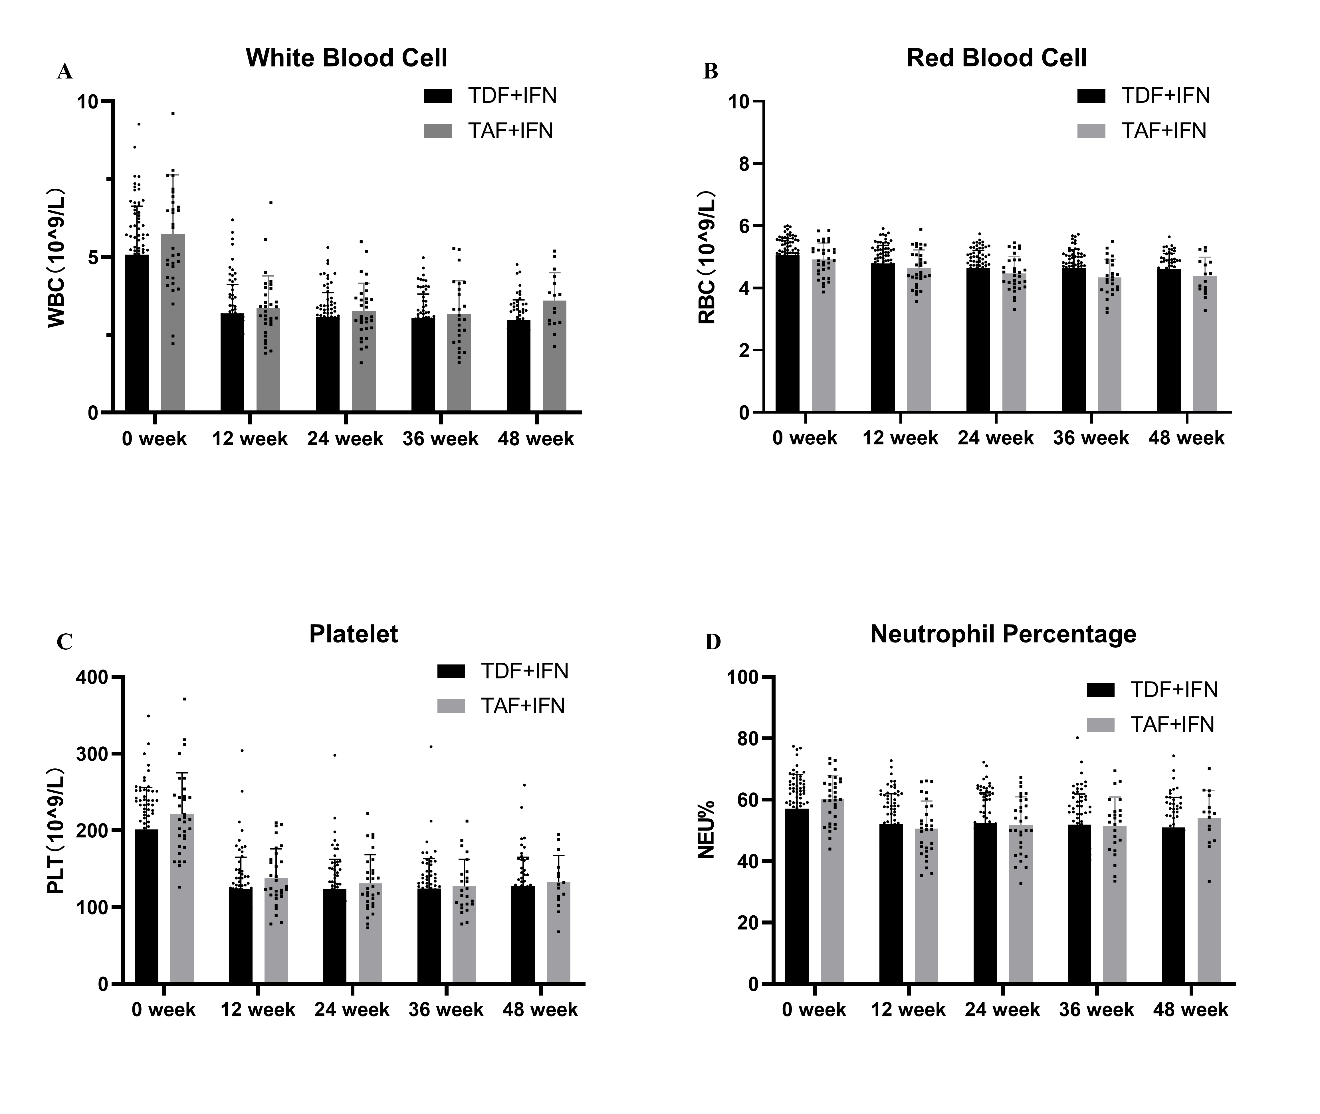

Supplement: Supplementary file 1 [file get_supplementary_file.php]
